## Correction: Renal cell carcinoma alters endothelial receptor expression responsible for leukocyte adhesion

Eva Juengel, Geraldine Krueger, Jochen Rutz, Karen Nelson, Isabella Werner, Bornha Relja, Barbara Seliger, Beate Fisslthaler, Ingrid Fleming, Igor Tsaur, Axel Haferkamp, Roman A. Blaheta

**Present:** Due to an error in the production process, figures 5 and 6 were switched. Each figure legend is correct, but is associated with the wrong figure.

Corrected: The proper figure legends are provided below. The publisher sincerely apologizes for this oversight.

Original article: Oncotarget. 2016; 7(15):20410-24. doi: 10.18632/oncotarget.7804.

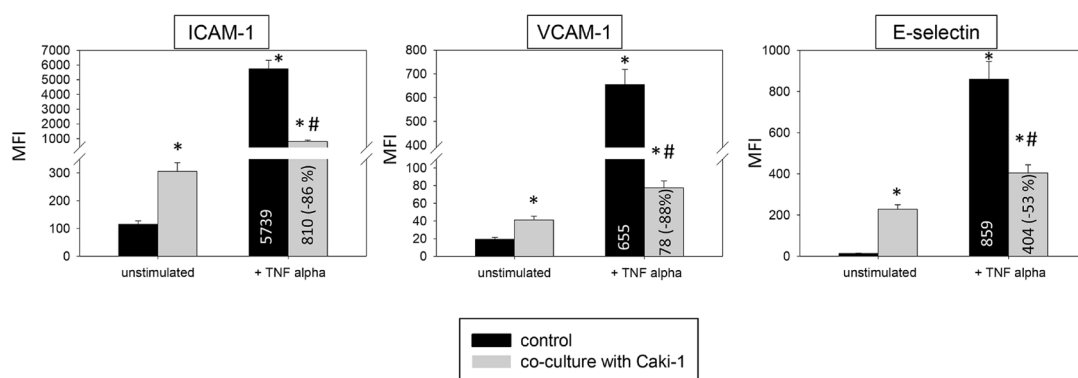

**Figure 5: Endothelial surface expression of adhesion receptors on HUVEC after TNF-alpha [500 U/ml] stimulation and/or co-cultivation with Caki-1 cells under flow conditions.** Expression of ICAM-1, VCAM-1 and E-selectin after 24h TNF-alpha [500 U/ml] stimulation. MFI = mean relative fluorescence intensity. \*indicates significant difference to untreated controls. #indicates significant difference to TNF-alpha/histamine stimulated HUVEC. n=6.

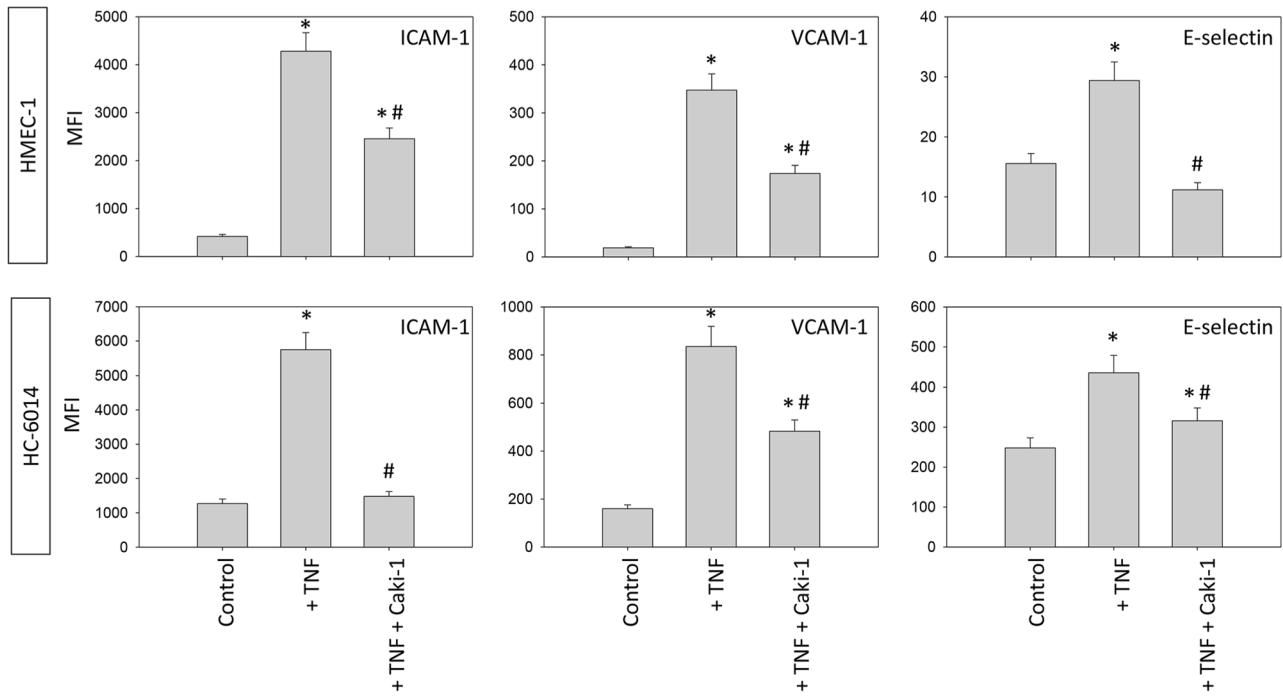

**Figure 6: Endothelial surface expression of adhesion receptors on HMEC-1 and HC-6014 cells after TNF-alpha [500 U/ml] stimulation and/or co-cultivation with Caki-1 cells.** Expression of ICAM-1, VCAM-1 and E-selectin after 24h TNF-alpha [500 U/ml] stimulation. MFI = mean relative fluorescence intensity. \*indicates significant difference to untreated controls. #indicates significant difference to TNF-alpha stimulated HUVEC. n=5.
